# Supplementary material for: Test of the Deception Hypothesis in Atlantic Mollies Poecilia mexicana—Does the Audience Copy a Pretended Mate Choice of Others?
Source: MDPI journal article supplement (doi:10.3390/biology7030040), 2018-07-13
Supplement: s1 [file s1]

#### *Additional information about stock tanks*

All fish were housed in a large (approx. 46.8 m<sup>2</sup>) room without windows. The room temperature was centrally controlled at 24–27 °C (humidity 50–60%), so that the water temperature in tanks was 22–25 °C. To provide best water quality, water was first filtered by a reverse-osmosis system and then minerals (Preis Diskus Mineralien, Bayerfeld, Germany) were added to achieve a conductivity of 200 µS/cm. The tanks were illuminated by two rows of twelve 125 cm long fluorescent lightings including UV-range (60 Watt, LZ 58), 2–12 cm above the tanks, which provided a light-dark cycle of 14:10 h.

All fish were separated by species and population and housed in mixed-sex shoals in large stock tanks (80 cm × 35 cm × 40 cm, water level 35 cm). All tanks contained a 3 cm gravel layer on the ground and several plants like *Aponogeton* spec, *Vallisneria* spec and *Lemna minor*. Water was cleaned by a filter (Hydor, Prime 20, Bassano del Grappa, Italia) and an UV-lamp (Tetra tec UV 400, Melle, Germany) and was additionally aerated by an air stone. The pH of the water was 7–8 and the conductivity was 400–500 µS/cm. Twenty litres of each tank were changed weekly. Every second week a teaspoon of salt (Ursalz, Ernteseegen, Radolfzell, Germany) and every six weeks a handful of mussel lime were added to each tank. All fish were fed twice a day with flake food (Novo Bel, JBL, Neuhofen, Germany), frozen chironomid larvae or frozen *Artemia* spec.



**Table S2.** Standard body length (mm) of individuals used in female mate-choice tests given as median (1. /3. quartile).

[illegible]

**Table S3.** Absolute Time (s) spent of males in mate-choice zones in front of stimulus females.

|                                                                                                          | 1. Mate-Choice Test          |                            |                       | 2. Mate-Choice Test        |                           |                       |
|----------------------------------------------------------------------------------------------------------|------------------------------|----------------------------|-----------------------|----------------------------|---------------------------|-----------------------|
|                                                                                                          | Preferred Females            | Non-Preferred Females      | Wilcoxon Test         | Preferred Females          | Non-Preferred Females     | Wilcoxon Test         |
| <i>Male mate choice experiments</i>                                                                      |                              |                            |                       |                            |                           |                       |
| <b>Focal males (N = 20)</b>                                                                              | 760.5 s (651 s / 930.8 s)    | 199.5 s (64.5 s / 288.5 s) | Z = -3.921, P < 0.001 | 155.5 s (76.3 s / 311.8 s) | 146 s (119 s / 391.5 s)   | Z = -0.355, P = 0.723 |
| <b>Audience males (N = 20)</b>                                                                           | 743 s (614.5 s / 888.3 s)    | 212 s (127.5 s / 297 s)    | Z = -3.922, P < 0.001 | 545.5 s (398 s / 764.5 s)  | 275 s (151.5 s / 399.3 s) | Z = -1.469, P = 0.142 |
| <i>Control 1 for mate-choice consistency in focal males</i>                                              |                              |                            |                       |                            |                           |                       |
| <b>Focal males (N = 20)</b>                                                                              | 7771.5 s (451.3 s / 922.3 s) | 109 s (54.8 s / 245.8 s)   | Z = -3.923, P < 0.001 | 506.5 s (229 s / 705.5 s)  | 338 s (78.8 s / 473.5 s)  | Z = -1.980, P = 0.048 |
| <i>Control 2 for mate-choice consistency in focal males when audience male inside an opaque cylinder</i> |                              |                            |                       |                            |                           |                       |
| <b>Focal males (N = 20)</b>                                                                              | 680 s (606 s / 849.5 s)      | 229 s (166.8 s / 273 s)    | Z = -3.923, P < 0.001 | 556 s (256.5 s / 612 s)    | 463 s (220.5 s / 599.8 s) | Z = -0.109, P = 0.913 |
| <b>Audience males (N = 20)</b>                                                                           | 779.5 s (558.8 s / 963.8 s)  | 291.5 s (58.5 s / 397.3 s) | Z = -3.825, P < 0.001 | 622 s (550.5 s / 858.8 s)  | 285 s (163.5 s / 524 s)   | Z = -2.913, P = 0.004 |

**Table S4.** Absolute Time (s) spent of females in mate-choice zones in front of stimulus males.

|                                                                                                       | 1. Mate-Choice test         |                             |                       | 2. Mate-Choice test         |                           |                       |
|-------------------------------------------------------------------------------------------------------|-----------------------------|-----------------------------|-----------------------|-----------------------------|---------------------------|-----------------------|
|                                                                                                       | Preferred Males             | Non-Preferred Males         | Wilcoxon Test         | Preferred Males             | Non-Preferred Males       | Wilcoxon Test         |
| <i>Female mate choice experiments</i>                                                                 |                             |                             |                       |                             |                           |                       |
| <b>Focal females (N = 20)</b>                                                                         | 732.5 s (572.3 s / 872.3 s) | 239.5 s (105.8 s / 327.5 s) | Z = -3.921, P < 0.001 | 206.5 s (99.3 s / 504.8 s)  | 154 s (53.8 s / 259.3 s)  | Z = -1.680, P = 0.093 |
| <b>Audience females (N = 20)</b>                                                                      | 617.5 s (545.5 s / 714.8 s) | 282 s (235 s / 339.8 s)     | Z = -3.924, P < 0.001 | 520.5 s (306.8 s / 616.3 s) | 421 s (215.5 s / 522.5 s) | Z = -1.450, P = 0.147 |
| <i>Control 1 for mate-choice consistency in focal females</i>                                         |                             |                             |                       |                             |                           |                       |
| <b>Focal females (N = 19)</b>                                                                         | 620 s (436 s / 788 s)       | 277 s (155 s / 347 s)       | Z = -3.824, P < 0.001 | 706 s (487 s / 703 s)       | 232 s (109 s / 399 s)     | Z = -3.293, P < 0.001 |
| <i>Control 2 for mate-choice consistency in focal females when audience inside an opaque cylinder</i> |                             |                             |                       |                             |                           |                       |
| <b>Focal females (N = 20)</b>                                                                         | 595 s (480.5 s / 773.5 s)   | 323.5 s (239.5 s / 407.3 s) | Z = -3.923, P < 0.001 | 575 s (392.3 s / 870.5 s)   | 293 s (150.5 s / 558 s)   | Z = -2.570, P = 0.010 |
| <b>Audience females (N = 20)</b>                                                                      | 769.5 s (596.3 s / 874 s)   | 185.5 s (114.3 s / 295.8 s) | Z = -3.921, P < 0.001 | 580 s (473.8 s / 666.8 s)   | 311.5 s (200.3 s / 608 s) | Z = -2.256, P = 0.024 |

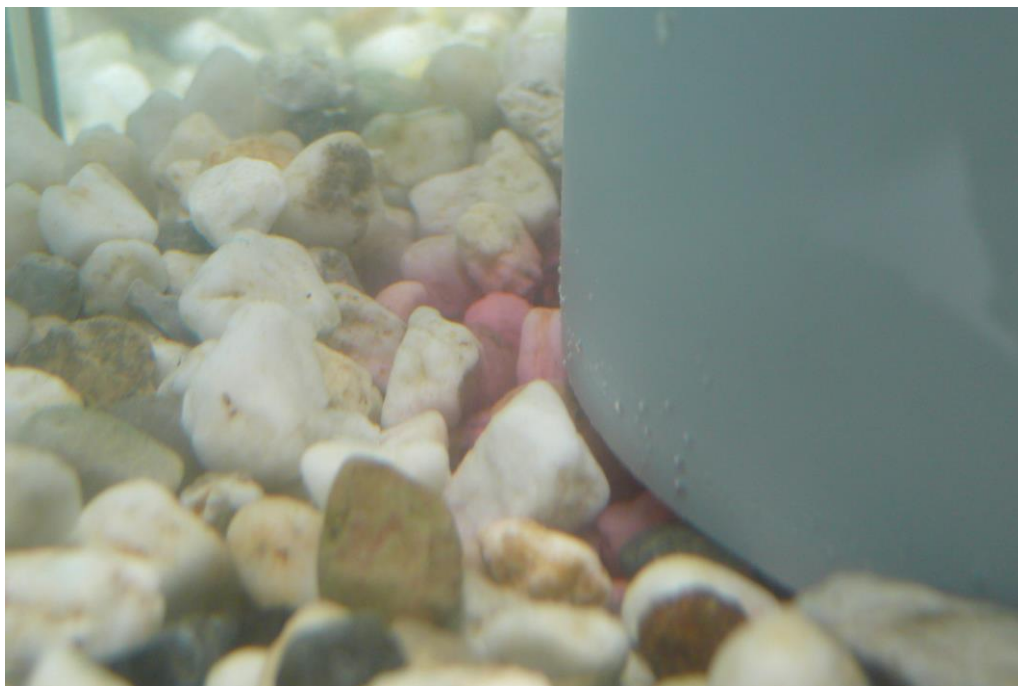

**Figure S1.** Red food coloring diffused at the bottom out of the cylinder and spread through the water of the large tank.
